# Supplementary material for: Wearable Sensor-Based Monitoring of Environmental Exposures and the Associated Health Effects: A Review
Source: MDPI journal article supplement (doi:10.3390/bios12121131), 2022-12-06
Supplement: s1 [file s1]

# **Wearable Sensor-Based Monitoring of Environmental Exposures and the Associated Health Effects: A Review**

**Xueer Lin <sup>1</sup>, Jiaying Luo <sup>1</sup>, Minyan Liao <sup>1</sup>, Yalan Su <sup>1</sup>, Mo Lv <sup>1</sup>, Qing Li <sup>2</sup>, Shenglan Xiao <sup>3,\*</sup> and Jianbang Xiang <sup>1,4,\*</sup>**

<sup>1</sup> School of Public Health (Shenzhen), Sun Yat-sen University, Shenzhen 518107, China

<sup>2</sup> College of Medicine and Biological Information Engineering, Northeastern University, Shenyang 110819, China

<sup>3</sup> School of Public Health (Shenzhen), Shenzhen Campus of Sun Yat-sen University, Shenzhen 518107, China

<sup>4</sup> State Environmental Protection Key Laboratory of Sources and Control of Air Pollution Complex, Beijing 100084, China

\* Correspondence: xiangjb@mail.sysu.edu.cn (J.X.); xiaoshlan3@mail.sysu.edu.cn (S.X.)

The supplementary materials contain three tables and one figure.

**Table S1.** Literature search strategy.

| Database       | No. | Query                                                                                                                | Records |
|----------------|-----|----------------------------------------------------------------------------------------------------------------------|---------|
| Web of Science | 1   | TS= (environmental factor*) AND TS = (using wearable*) AND TS = (health effect*)                                     | 47      |
|                | 2   | TS=(environmental (factor* OR exposure)) AND TS=(using (wearable OR mobile OR portable)) AND TS=(health effect*)     | 1828    |
|                | 3   | TS=(nois*(factor* OR exposure)) AND TS=(using (wearable OR mobile OR portable)) AND TS=(health effect*)              | 192     |
|                | 4   | TS=(heat (factor* OR exposure)) AND TS=(using (wearable OR mobile OR portable)) AND TS=(health effect*)              | 258     |
|                | 5   | TS=(temperature (factor* OR exposure)) AND TS=(using (wearable OR mobile OR portable)) AND TS=(health effect*)       | 470     |
|                | 6   | TS=(humid* (factor* OR exposure)) AND TS=(using (wearable OR mobile OR portable)) AND TS=(health effect*)            | 116     |
|                | 7   | TS=(radiat* (factor* OR exposure)) AND TS=(using (wearable OR mobile OR portable)) AND TS=(health effect*)           | 1808    |
|                | 8   | TS=(UV*(factor* OR exposure)) AND TS=(using (wearable OR mobile OR portable)) AND TS=(health effect*)                | 106     |
|                | 9   | TS=(electromagnetic *(factor* OR exposure)) AND TS=(using (wearable OR mobile OR portable)) AND TS=(health effect*)  | 1270    |
|                | 10  | TS=(ozone (factor* OR exposure)) AND TS=(using (wearable OR mobile OR portable)) AND TS=(health effect*)             | 97      |
|                | 11  | TS=((nitrogen* OR NO) (factor* OR exposure)) AND TS=(using (wearable OR mobile OR portable)) AND TS=(health effect*) | 1769    |
|                | 12  | TS=((NH3 OR ammonia) (factor* OR exposure)) AND TS=(using (wearable OR mobile OR portable)) AND TS=(health effect*)  | 30      |
|                | 13  | TS=(chemical* (factor* OR exposure)) AND TS=(using (wearable OR mobile OR portable)) AND TS=(health effect*)         | 799     |
|                | 14  | TS=(organic* (factor* OR exposure)) AND TS=(using (wearable OR mobile OR portable)) AND TS=(health effect*)          | 625     |
|                | 15  | TS=(inorganic* (factor* OR exposure)) AND TS=(using (wearable OR mobile OR portable)) AND TS=(health effect*)        | 36      |
|                | 16  | TS=(formaldehyde (factor* OR exposure)) AND TS=(using (wearable OR mobile OR portable)) AND TS=(health effect*)      | 36      |
|                | 17  | TS=((VOC* OR TVOC*)(factor* OR exposure)) AND TS=(using (wearable OR mobile OR portable)) AND TS=(health effect*)    | 68      |
|                | 18  | TS=((partic* OR PM) (factor* OR exposure)) AND TS=(using (wearable OR mobile OR portable)) AND TS=(health effect*)   | 3145    |
|                | 19  | TS=(virus (factor* OR infect*)) AND TS=(using (wearable OR mobile OR portable)) AND TS=(health effect*)              | 1181    |
|                | 20  | TS=(((bacteria OR virus OR fungi) exposure) AND (using( wearable OR mobile OR portable) )AND (health effect*))       | 211     |
| PubMed         | 21  | (environment*) AND (using wearable*) AND (health effect*)                                                            | 24      |
|                | 22  | (environment*) AND (using wearable OR mobile OR portable) AND (health effect*)                                       | 224     |
|                | 23  | (noise) AND (using wearable OR mobile OR portable) AND (health effect*)                                              | 11      |
|                | 24  | (heat) AND (using wearable OR mobile OR portable) AND (health effect*)                                               | 7       |
|                | 25  | (temperature) AND (using wearable OR mobile OR portable) AND (health effect*)                                        | 23      |
|                | 26  | (humid*) AND (using wearable OR mobile OR portable) AND (health effect*)                                             | 8       |
|                | 27  | (radiat*) AND (using wearable OR mobile OR portable) AND (health effect*)                                            | 71      |

| Database | No. | Query                                                                                        | Records |
|----------|-----|----------------------------------------------------------------------------------------------|---------|
|          | 28  | (UV*) AND (using wearable OR mobile OR portable) AND (health effect*)                        | 8       |
|          | 29  | (electromagnetic) AND (using wearable OR mobile OR portable) AND (health effect*)            | 71      |
|          | 30  | (ozone) AND (using wearable OR mobile OR portable) AND (health effect*)                      | 0       |
|          | 31  | (nitrogen* OR NO) AND (using wearable OR mobile OR portable) AND (health effect*)            | 5       |
|          | 32  | (NH3 OR ammonia) AND (using wearable OR mobile OR portable) AND (health effect*)             | 1       |
|          | 33  | (chemical) AND (using wearable OR mobile OR portable) AND (health effect*)                   | 35      |
|          | 34  | (organic*) AND (using wearable OR mobile OR portable) AND (health effect*)                   | 4       |
|          | 35  | (inorganic*) AND (using wearable OR mobile OR portable) AND (health effect*)                 | 0       |
|          | 36  | (formaldehyde) AND (using wearable OR mobile OR portable) AND (health effect*)               | 0       |
|          | 37  | (VOC* OR TVOC*) AND (using wearable OR mobile OR portable) AND (health effect*)              | 1       |
|          | 38  | (partic* OR PM)) AND (using wearable OR mobile OR portable) AND (health effect*)             | 1839    |
|          | 39  | (virus factor* OR infect*) AND (using wearable OR mobile OR portable) AND (health effect*)   | 228     |
|          | 40  | (bacteria OR virus OR fungi) AND (using wearable OR mobile OR portable) AND (health effect*) | 99      |

**Table S2.** Summary of the included studies.

| Study | Title                                                                                                                                                                                                                  | Year | Location | Media | Environmental Factor |
|-------|------------------------------------------------------------------------------------------------------------------------------------------------------------------------------------------------------------------------|------|----------|-------|----------------------|
| [1]   | Blood Pressure of Jordanian Workers Chronically Exposed to Noise in Industrial Plants                                                                                                                                  | 2017 | Jordan   | Air   | Noise                |
| [2]   | Evaluation of wearable sensors for physiologic monitoring of individually experienced temperatures in outdoor workers in southeastern US                                                                               | 2019 | USA      | Air   | Temperature          |
| [3]   | Estimating personal ambient temperature in moderately cold environments for occupationally exposed populations                                                                                                         | 2019 | USA      | Air   | Temperature          |
| [4]   | An exposure assessment study of ambient heat exposure in an elderly population in Baltimore, Maryland                                                                                                                  | 2002 | USA      | Air   | Temperature          |
| [5]   | Lung function decrement with arsenic exposure to drinking groundwater along River Indus: a comparative cross-sectional study                                                                                           | 2011 | Pakistan | Water | Metal                |
| [6]   | Identifying causal relationships in time-series data from a pair of wearable sensors                                                                                                                                   | 2021 | UK       | Air   | PM                   |
| [7]   | Effect of short-term exposure to particulate air pollution on heart rate variability in normal-weight and obese adults                                                                                                 | 2021 | China    | Air   | PM                   |
| [8]   | A community-based study on associations between PM2.5 and PM1 exposure and heart rate variability using wearable low-cost sensing devices                                                                              | 2021 | China    | Air   | PM                   |
| [9]   | Declines in heart rate variability associated with short-term PM2.5 exposure were modified by blood pressure control and treatment: A multi-city panel study in China                                                  | 2021 | China    | Air   | PM                   |
| [10]  | Personal exposure to fine particulate air pollutants impacts blood pressure and heart rate variability                                                                                                                 | 2020 | USA      | Air   | PM                   |
| [11]  | Panel study using novel sensing devices to assess associations of PM(2.5)with heart rate variability and exposure sources                                                                                              | 2020 | China    | Air   | PM                   |
| [12]  | Effects of Personal Exposures to Micro- and Nano-Particulate Matter, Black Carbon, Particle-Bound Polycyclic Aromatic Hydrocarbons, and Carbon Monoxide on Heart Rate Variability in a Panel of Healthy Older Subjects | 2019 | China    | Air   | PM, CO               |
| [13]  | Impact of traffic-related air pollution on acute changes in cardiac autonomic modulation during rest and physical activity: a cross-over study                                                                         | 2016 | Spain    | Air   | PM, Noise            |
| [14]  | Effects of Personal Exposure to Ambient Fine Particulate Matter on Acute Change in Nocturnal Heart Rate Variability in Subjects Without Overt Heart Disease                                                            | 2016 | USA      | Air   | PM                   |

| Study | Title                                                                                                                                                               | Year | Location | Media | Environmental Factor        |
|-------|---------------------------------------------------------------------------------------------------------------------------------------------------------------------|------|----------|-------|-----------------------------|
| [15]  | Comparison of particulate matter dose and acute heart rate variability response in cyclists, pedestrians, bus and train passengers                                  | 2014 | Ireland  | Air   | PM                          |
| [16]  | Individual-level PM <sub>2.5</sub> exposure and the time course of impaired heart rate variability: the APACR Study                                                 | 2011 | USA      | Air   | PM                          |
| [17]  | Beneficial cardiovascular effects of reducing exposure to particulate air pollution with a simple facemask                                                          | 2009 | China    | Air   | PM                          |
| [18]  | Effects of personal particulate matter on peak expiratory flow rate of asthmatic children                                                                           | 2007 | China    | Air   | PM                          |
| [19]  | Association of heart rate variability with occupational and environmental exposure to particulate air pollution                                                     | 2001 | USA      | Air   | PM                          |
| [20]  | Impacts of In-Cabin Exposure to Size-Fractionated Particulate Matters and Carbon Monoxide on Changes in Heart Rate Variability for Healthy Public Transit Commuters | 2019 | China    | Air   | PM, CO                      |
| [21]  | Acute respiratory response to traffic-related air pollution during physical activity performance                                                                    | 2016 | Spain    | Air   | PM, NO <sub>x</sub>         |
| [22]  | The Relationship between City Size and Carbon Monoxide (CO) Concentration and Their Effect on Heart Rate Variability (HRV)                                          | 2021 | Israel   | Air   | CO                          |
| [23]  | Tracking Personal Health-Environment Interaction with Novel Mobile Sensing Devices                                                                                  | 2018 | USA      | Air   | TVOCs                       |
| [24]  | Respiratory health and lung function in Chinese restaurant kitchen workers                                                                                          | 2011 | China    | Air   | CO, CO <sub>2</sub> , TVOCs |

**Table S3.** Characteristics of some portable instruments for environmental measurements.

| <b>Environmental factor</b> | <b>Instrument</b>                       | <b>Dimensions (mm)</b> | <b>Weight (kg)</b> | <b>Price (US dollars)</b> | <b>Link</b>                                                                                                                                                                                                               |
|-----------------------------|-----------------------------------------|------------------------|--------------------|---------------------------|---------------------------------------------------------------------------------------------------------------------------------------------------------------------------------------------------------------------------|
| Noise                       | Casella sound level meter CEL-450A      | 340 x 100 x 40         | 0.55               | ~4000                     | <a href="https://www.jjstech.com/cel-450-c2-k1.html">https://www.jjstech.com/cel-450-c2-k1.html</a>                                                                                                                       |
| NO <sub>x</sub>             | 2B Tech. Model 410 Nitric Oxide Monitor | 130 x 210 x 340        | 3.7                | ~8000                     | <a href="https://twobtech.com/docs/manuals/model_410_revE.pdf">https://twobtech.com/docs/manuals/model_410_revE.pdf</a>                                                                                                   |
| TVOCs                       | RAE Systems PGM-7240                    | 255 x 76 x 64          | 0.738              | ~4000                     | <a href="https://www.frontline-safety.co.uk/ppbrae-3000-model-pgm-7340-monitor-accessories-kit">https://www.frontline-safety.co.uk/ppbrae-3000-model-pgm-7340-monitor-accessories-kit</a>                                 |
| PM <sub>2.5</sub>           | TSI DustTrak 8534                       | 125 x 121 x 316        | 1.3                | ~5000                     | <a href="https://norrscope.com/product/tsi-8534-dusttrak-drx/">https://norrscope.com/product/tsi-8534-dusttrak-drx/</a>                                                                                                   |
| UFPs                        | TSI CPC 3007                            | 292 x 140 x 140        | 1.7                | ~5000                     | <a href="https://tsi.com/getmedia/a1852300-29bc-4a4b-acaa-4220bfd65334/3007_1930032-CPC-Spec-Sheet-US?ext=.pdf">https://tsi.com/getmedia/a1852300-29bc-4a4b-acaa-4220bfd65334/3007_1930032-CPC-Spec-Sheet-US?ext=.pdf</a> |

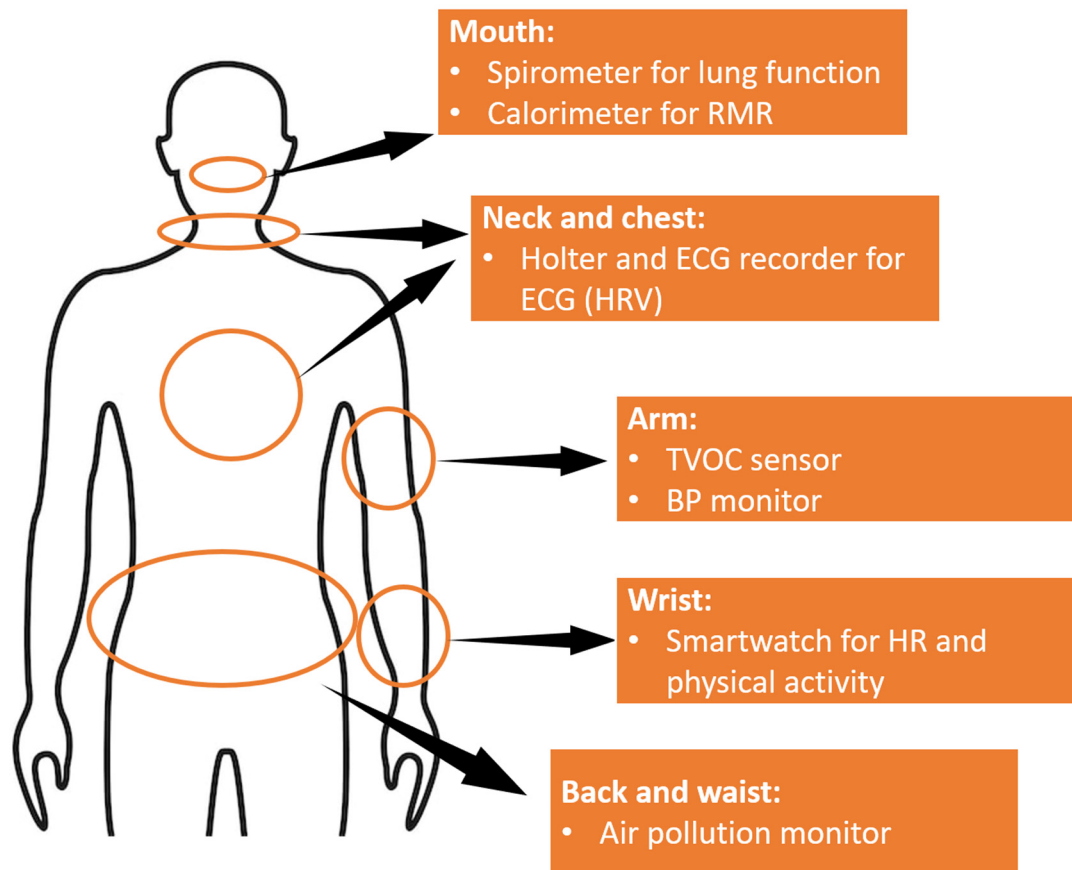

**Figure S1.** Illustration of the typical sensors and the wearable positions in the included studies.

## References

1. Nserat, S.; Al-Musa, A.; Khader, Y.S.; Abu Slaih, A.; Iblan, I. Blood pressure of jordanian workers chronically exposed to noise in industrial plants. *International Journal of Occupational and Environmental Medicine* **2017**, *8*, 217-223. <https://doi:10.15171/ijoem.2017.1134>.
2. Runkle, J.D.; Cui, C.; Fuhrmann, C.; Stevens, S.; Del Pinal, J.; Sugg, M.M. Evaluation of wearable sensors for physiologic monitoring of individually experienced temperatures in outdoor workers in southeastern US. *Environ. Int.* **2019**, *129*, 229-238. <https://doi:10.1016/j.envint.2019.05.026>.
3. Sugg, M.M.; Stevens, S.; Runkle, J.D. Estimating personal ambient temperature in moderately cold environments for occupationally exposed populations. *Environ. Res.* **2019**, *173*, 497-507. <https://doi:10.1016/j.envres.2019.03.066>.
4. Basu, R.; Samet, J.M. An exposure assessment study of ambient heat exposure in an elderly population in Baltimore, Maryland. *Environ. Health Perspect.* **2002**, *110*, 1219-1224. <https://doi:10.1289/ehp.021101219>.
5. Nafees, A.A.; Kazi, A.; Fatmi, Z.; Irfan, M.; Ali, A.; Kayama, F. Lung function decrement with arsenic exposure to drinking groundwater along River Indus: a comparative cross-sectional study. *Environ. Geochem. Health* **2011**, *33*, 203-216. <https://doi:10.1007/s10653-010-9333-7>.
6. Arvind, D.K.; Maiya, S.; Sedeno, P.A. Identifying causal relationships in time-series data from a pair of wearable sensors. In Proceedings of the 2021 IEEE 17th International Conference on Wearable and Implantable Body Sensor Networks (BSN), Athens, Greece, 27–30 July 2021. <https://doi.org/10.1109/bsn51625.2021.9507030>.
7. Li, L.Y.; Hu, D.Y.; Zhang, W.L.; Cui, L.Y.; Jia, X.; Yang, D.; Liu, S.; Deng, F.R.; Liu, J.X.; Guo, X.B. Effect of short-term exposure to particulate air pollution on heart rate variability in normal-weight and obese adults. *Environ. Health* **2021**, *20*, 29. <https://doi:10.1186/s12940-021-00707-0>.
8. Tsou, M.C.M.; Lung, S.C.C.; Shen, Y.S.; Liu, C.H.; Hsieh, Y.H.; Chen, N.; Hwang, J.S. A community-based study on associations between PM<sub>2.5</sub> and PM<sub>1</sub> exposure and heart rate variability using wearable low-cost sensing devices. *Environ. Pollut.* **2021**, *277*, 116761. <https://doi.org/10.1016/j.envpol.2021.116761>.
9. Xing, X.L.; Liu, F.C.; Yang, X.L.; Liu, Q.; Wang, X.Y.; Lin, Z.N.; Huang, K.Y.; Cao, J.; Li, J.X.; Fan, M.; et al. Declines in heart rate variability associated with short-term PM<sub>2.5</sub> exposure were modified by blood pressure control and treatment: A multi-city panel study in China\*. *Environmental Pollution* **2021**, *287*, 117572. <https://doi:10.1016/j.envpol.2021.117572>.
10. Lee, D.H.; Kim, S.H.; Kang, S.H.; Kwon, O.K.; Park, J.J.; Yoon, C.H.; Cho, Y.S.; Heo, J.; Yi, S.M.; Youn, T.J.; et al. Personal exposure to fine particulate air pollutants impacts blood pressure and heart rate variability. *Sci. Rep.* **2020**, *10*, 16538. <https://doi:10.1038/s41598-020-73205-x>.
11. Lung, S.C.C.; Chen, N.; Hwang, J.S.; Hu, S.C.; Wang, W.C.V.; Wen, T.Y.J.; Liu, C.H. Panel study using novel sensing devices to assess associations of PM<sub>2.5</sub> with heart rate variability and exposure sources. *J. Expo. Sci. Environ. Epidemiol.* **2020**, *30*, 937-948. <https://doi:10.1038/s41370-020-0254-y>.
12. Tang, C.-S.; Chuang, K.-J.; Chang, T.-Y.; Chuang, H.-C.; Chen, L.-H.; Lung, S.-C.C.; Chang, L.-T. Effects of personal exposures to micro- and nano-particulate matter, black carbon, particle-bound polycyclic aromatic hydrocarbons, and carbon monoxide on heart rate variability in a panel of healthy older subjects. *Int. J. Env. Res. Public Health* **2019**, *16*, 4672. <https://doi:10.3390/ijerph16234672>.
13. Cole-Hunter, T.; Weichenthal, S.; Kubesch, N.; Foraster, M.; Carrasco-Turigas, G.; Bouso, L.; Martinez, D.; Westerdahl, D.; de Nazelle, A.; Nieuwenhuijsen, M. Impact of traffic-related air pollution on acute changes in cardiac autonomic modulation during rest and physical activity: A cross-over study. *J. Expo. Sci. Environ. Epidemiol.* **2016**, *26*, 133-140. <https://doi:10.1038/jes.2015.66>.
14. Lee, M.S.; Eum, K.D.; Rodrigues, E.G.; Magari, S.R.; Fang, S.C.; Modest, G.A.; Christiani, D.C. Effects of personal exposure to ambient fine particulate matter on acute change in



nocturnal heart rate variability in subjects without overt heart disease. *Am. J. Cardiol.* **2016**, *117*, 151-156. <https://doi:10.1016/j.amjcard.2015.10.015>.

15. Nyhan, M.; McNabola, A.; Misstear, B. Comparison of particulate matter dose and acute heart rate variability response in cyclists, pedestrians, bus and train passengers. *Sci. Total Environ.* **2014**, *468*, 821-831. <https://doi:10.1016/j.scitotenv.2013.08.096>.
16. He, F.; Shaffer, M.L.; Li, X.A.; Rodriguez-Colon, S.; Wolbrette, D.L.; Williams, R.; Cascio, W.E.; Liao, D.P. Individual-level PM<sub>2.5</sub> exposure and the time course of impaired heart rate variability: the APACR Study. *J. Expo. Sci. Environ. Epidemiol.* **2011**, *21*, 65-73. <https://doi:10.1038/jes.2010.21>.
17. Langrish, J.P.; Mills, N.L.; Chan, J.K.K.; Leseman, D.; Aitken, R.J.; Fokkens, P.H.B.; Cassee, F.R.; Li, J.; Donaldson, K.; Newby, D.E.; et al. Beneficial cardiovascular effects of reducing exposure to particulate air pollution with a simple facemask. *Part. Fibre Toxicol.* **2009**, *6*, 8. <https://doi:10.1186/1743-8977-6-8>.
18. Tang, C.S.; Chang, L.T.; Lee, H.C.; Chan, C.C. Effects of personal particulate matter on peak expiratory flow rate of asthmatic children. *Sci. Total Environ.* **2007**, *382*, 43-51. <https://doi:10.1016/j.scitotenv.2007.04.016>.
19. Magari, S.R.; Hauser, R.; Schwartz, J.; Williams, P.L.; Smith, T.J.; Christiani, D.C. Association of heart rate variability with occupational and environmental exposure to particulate air pollution. *Circulation* **2001**, *104*, 986-991. <https://doi:10.1161/hc3401.095038>.
20. Tang, C.S.; Wu, T.Y.; Chuang, K.J.; Chang, T.Y.; Chuang, H.C.; Lung, S.C.C.; Chang, L.T. Impacts of in-cabin exposure to size-fractionated particulate matters and carbon monoxide on changes in heart rate variability for healthy public transit commuters. *Atmosphere* **2019**, *10*, 409. <https://doi:10.3390/atmos10070409>.
21. Matt, F.; Cole-Hunter, T.; Donaire-Gonzalez, D.; Kubesch, N.; Martinez, D.; Carrasco-Turigas, G.; Nieuwenhuijsen, M. Acute respiratory response to traffic-related air pollution during physical activity performance. *Environ. Int.* **2016**, *97*, 45-55. <https://doi:10.1016/j.envint.2016.10.011>.
22. Saadi, D.; Tirosch, E.; Schnell, I. The relationship between city size and carbon monoxide (CO) concentration and their effect on heart rate variability (HRV). *Int. J. Env. Res. Public Health* **2021**, *18*, 788. <https://doi:10.3390/ijerph18020788>.
23. Deng, Y.; Liu, N.Y.; Tsow, F.; Xian, X.J.; Krajmalnik-Brown, R.; Tao, N.J.; Forzani, E. Tracking personal health-environment interaction with novel mobile sensing devices. *Sensors* **2018**, *18*, 2670. <https://doi:10.3390/s18082670>.
24. Wong, T.W.; Wong, A.H.S.; Lee, F.S.C.; Qiu, H. Respiratory health and lung function in Chinese restaurant kitchen workers. *Occup. Environ. Med.* **2011**, *68*, 746-752. <https://doi:10.1136/oem.2010.059378>.
